# Supplementary material
Source: PubMed Central journal article supplement (PMC5444417)
Supplement: Supp_Table1.pdf [file Supp_Table1.pdf]

## Supplementary Data

SUPPLEMENTARY TABLE S1. LIST OF PRIMERS USED IN THE STUDY

| <i>Primer name</i>                               | <i>Forward primer (5'-3')</i> | <i>Reverse primer (5'-3')</i> |
|--------------------------------------------------|-------------------------------|-------------------------------|
| Primer sequences for sequencing of the GJB2 gene |                               |                               |
| <i>GJB2</i> -Exon-1                              | CGTAAC TTTCC CAGTCTCCG        | GCAACCGCTCTGGGTCTC            |
| <i>GJB2</i> -Exon-2-1                            | TTATGACACTCCCCAGCACA          | GAAATGCTAGCGACTGAGCC          |
| <i>GJB2</i> -Exon-2-2                            | CAGTTTAAACGCATTGCCCA          | ACAGAACTTCTCCCTCCCC           |
| <i>GJB2</i> -Exon-2-3                            | CATCGGAAAGAACGCTGATT          | GGGTCAGACACTCTGGCAAC          |
| Site-specific primers for mutation confirmation  |                               |                               |
| <i>MYO7A</i> c.1954T>C                           | AGCCTTTGTCTGGGTTGGTC          | GCCCTGGTCTTGTTCCTTACAC        |
| <i>MYO7A</i> c.4184dupA                          | ACTTCCTCTTCTGCTGTTTGTC        | TACCTTCTTGTGGCGGCGATG         |
| <i>SLC26A4</i> c.679G>C                          | GGAGGAAGGGGAGTGATAGGGT        | TTTCTGGAATGAACAGTGACCC        |
| <i>SLC26A4</i> c.304+2T>C                        | GGTTGTGACTGAGATTGGA           | CTGCCTAGTATATGCCTCTAA         |
| <i>SLC26A4</i> c.1667A>G                         | TCCTTGCTAAGTAGCCAGAAATG       | GAATGAATGAAGTCTCAAAAGAGG      |
| <i>ESPN</i> c.2519G>A                            | CCCCACTGCCTCAGGAAAGA          | CCGCAGGAAAACAAAGTCAC          |
| <i>MYO7A</i> c.2367+1G>C                         | GGGAACAGCACTGGGCTCACTT        | TTCGGTCTGGAGGAATGGTAG         |
| <i>LRTOMT</i> c.154C>T                           | AAGACTTAGCCTTTCTGAGCCG        | CCTGGCACCTAGCACATTCC          |
| <i>GJB2</i> c.35delG                             | TTATGACACTCCCCAGCACA          | GAAATGCTAGCGACTGAGCC          |
| <i>PCDH15</i> c.4726C>T                          | ATTCATTCTGCGTAGCTTTTCG        | CCTACCCTTGACTTCTTGACC         |
| <i>LHFPL5</i> c.246delC                          | CCAACTATGTGCGGAACTCG          | GATGGAGCCAATGATGAGGAA         |
| <i>EPS8 L2</i> c.737delC                         | TTCGGCAGCGGCAGTCCAT           | CCACAAACCACTCGATGTCGTCC       |
| <i>USH2A</i> c. 10510C>G                         | CCAGATGTGAACCTCAAGCCCTAC      | TTATGGAGGAGATGGATTCTTGAC      |
| <i>USH2A</i> c. 8431C>A                          | TCATCCAGAACGGAGACATACTT       | TTGGCTTGGATGGTGGTTGC          |
